# Supplementary material
Source: PubMed Central journal article supplement (PMC4702032)
Supplement: 97320630011543S1.pdf [file 97320630011543S1.pdf]

## Supplementary material:

**Table 1:** Flavonoids and selective COX-2 blocker having anticancer activities.

| Flavonoids                   | Pubchem id  | Organ or tissue type                                           | References |
|------------------------------|-------------|----------------------------------------------------------------|------------|
| Delphinidin                  | CID 128853  | Skin cancer                                                    | [84, 85]   |
| Quercetin                    | CID 5280343 | Skin cancer                                                    | [86, 87]   |
| Myricetin                    | CID 5281672 | Skin cancer                                                    | [88-92]    |
| Equol                        | CID 91469   | Skin cancer, Prostate cancer, Breast Cancer                    | [93, 94]   |
| Isorhamnetin                 | CID 5281654 | <b>Article I.</b> Skin cancer, Colon cancer, Colorectal cancer | [95-97]    |
| Quercetin-3-methyl ether     | CID 5280681 | <b>Article II.</b> Skin cancer, Breast cancer, Leukaemia       | [98-100]   |
| Kaempferol                   | CID 5280863 | Skin cancer, Colon cancer                                      | [101-103]  |
| Eriodictyol                  | CID 440735  | Skin cancer, Breast Cancer                                     | [104, 105] |
| Luteolin                     | CID 5280445 | Skin cancer, Lung cancer, Prostate cancer, Colon cancer.       | [106-110]  |
| 5-deoxykaempferol            | CID 5281611 | Skin cancer                                                    | [111]      |
| 7,3',4'-Trihydroxyisoflavone | CID 5284648 | Skin cancer                                                    | [72]       |
| 4',6,7-trihydroxyisoflavone  | CID 5284649 | Colon cancer                                                   | [112]      |
| Celcoxib                     | CID 2662    | Cyclooxygenase-2 inhibitor in cancer                           | [113, 114] |

**Table 2:** Summary of FlexX docking results with COX-2 and ligands.

| Flavonoids                   | Score  | Match  | Lipo   | Ambig | Clash | Rot | $\Delta G$ KJ/mol | Ligand Efficiency |
|------------------------------|--------|--------|--------|-------|-------|-----|-------------------|-------------------|
| Celcoxib                     | -26.85 | -21.15 | -14.73 | -7.33 | 6.77  | 4.2 | -29               | 0.27              |
| Isorhamnetin                 | -20.93 | -22.32 | -11.21 | -8.56 | 8.76  | 7.0 | -30               | 0.31              |
| 5-deoxykaempferol            | -19.26 | -15.65 | -11.83 | -5.77 | 4.40  | 4.2 | -29               | 0.35              |
| Equol                        | -21.94 | -17.43 | -12.88 | -5.71 | 4.48  | 4.2 | -27               | 0.36              |
| 4',6,7-trihydroxyisoflavone  | -20.61 | -17.03 | -10.03 | -6.17 | 3.89  | 4.2 | -26               | 0.31              |
| Eriodictyol                  | -24.63 | -24.97 | -11.21 | -7.43 | 6.58  | 7.0 | -23               | 0.26              |
| Quercetin                    | -21.66 | -24.06 | -11.19 | -6.85 | 8.05  | 7.0 | -20               | 0.21              |
| Myricetin                    | -21.59 | -23.18 | -12.27 | -7.26 | 7.38  | 8.4 | -19               | 0.20              |
| 7,3',4'-Trihydroxyisoflavone | -26.25 | -23.85 | -11.82 | -6.92 | 6.75  | 4.2 | -18               | 0.22              |
| Quercetin-3-methyl ether     | -24.88 | -25.55 | -10.48 | -7.76 | 6.51  | 7.0 | -16               | 0.16              |
| Kaempferol                   | -20.92 | -17.93 | -13.00 | -7.33 | 6.35  | 5.6 | -15               | 0.17              |
| Delphinidin                  | -18.41 | -23.92 | -11.55 | -7.36 | 10.36 | 8.4 | -15               | 0.16              |
| Luteolin                     | -27.67 | -26.93 | -10.23 | -7.25 | 5.75  | 5.6 | -13               | 0.14              |

**Table 3:** Type of interactions and interacting amino acid residues of COX-2 protein with selected ligands, generated from ArgusLab.

| Flavonoids                   | Binding Energy kcal/mol | H-Bonding                                                                 | Hydrophobic Bonding                                                                          |                  |                                                        | Pi-Cation        |
|------------------------------|-------------------------|---------------------------------------------------------------------------|----------------------------------------------------------------------------------------------|------------------|--------------------------------------------------------|------------------|
|                              |                         |                                                                           | Pi - Alkyl                                                                                   | Pi-Pi            | Pi-Sigma                                               |                  |
| Celcoxib                     | -9.35                   | Q <sup>192</sup> , R <sup>120</sup> , L <sup>531</sup> , S <sup>530</sup> | V <sup>523</sup> , A <sup>527</sup> , L <sup>352</sup> , F <sup>198</sup>                    | -                | V <sup>349</sup> , Y <sup>348</sup>                    | -                |
| Isorhamnetin                 | -8.25                   | -                                                                         | V <sup>349</sup> , L <sup>352</sup> , V <sup>523</sup>                                       | -                | S <sup>353</sup> , A <sup>527</sup> , V <sup>523</sup> | -                |
| 5-deoxykaempferol            | -9.14                   | -                                                                         | V <sup>523</sup> , I <sup>517</sup> , A <sup>516</sup>                                       | Y <sup>355</sup> | V <sup>349</sup>                                       | -                |
| Equol                        | -9.92                   | Q <sup>192</sup> , F <sup>518</sup>                                       | V <sup>523</sup> , V <sup>349</sup> , L <sup>352</sup> , L <sup>531</sup> , A <sup>527</sup> | -                | -                                                      | -                |
| 4',6,7-trihydroxyisoflavone  | -9.89                   | S <sup>530</sup>                                                          | V <sup>523</sup> , A <sup>527</sup> , L <sup>352</sup> , L <sup>531</sup>                    | -                | V <sup>349</sup>                                       | -                |
| Eriodictyol                  | -9.50                   | F <sup>518</sup> , R <sup>120</sup>                                       | -                                                                                            | -                | A <sup>527</sup> , V <sup>349</sup> , V <sup>523</sup> | -                |
| Quercetin                    | -8.94                   | R <sup>513</sup> , R <sup>120</sup> , Q <sup>192</sup>                    | V <sup>523</sup> , V <sup>349</sup> , L <sup>352</sup>                                       | -                | V <sup>523</sup> , A <sup>527</sup>                    | -                |
| Myricetin                    | -8.91                   | R <sup>120</sup>                                                          | V <sup>349</sup> , V <sup>523</sup>                                                          | -                | A <sup>527</sup> , V <sup>523</sup>                    | -                |
| 7,3',4'-Trihydroxyisoflavone | -9.86                   | -                                                                         | A <sup>527</sup> , V <sup>523</sup> , L <sup>531</sup> , L <sup>352</sup>                    | -                | S <sup>353</sup> , V <sup>349</sup>                    | -                |
| Quercetin-3-methyl ether     | -8.26                   | H <sup>90</sup> , S <sup>530</sup>                                        | A <sup>527</sup> , V <sup>349</sup> , L <sup>352</sup>                                       | -                | V <sup>349</sup> , V <sup>523</sup>                    | -                |
| Kaempferol                   | -10.64                  | W <sup>385</sup> , S <sup>530</sup>                                       | V <sup>349</sup> , L <sup>352</sup>                                                          | -                | L <sup>352</sup> , V <sup>523</sup> , A <sup>516</sup> | -                |
| Delphinidin                  | -8.94                   | E <sup>524</sup>                                                          | V <sup>89</sup> , V <sup>116</sup> , I <sup>112</sup>                                        | Y <sup>355</sup> | L <sup>93</sup>                                        | R <sup>120</sup> |
| Luteolin                     | -10.72                  | S <sup>530</sup>                                                          | A <sup>516</sup> , L <sup>352</sup> , V <sup>349</sup>                                       | -                | V <sup>523</sup>                                       | -                |
